# Supplementary material for: A Pilot Trial Using Lymphocytes Genetically Engineered with an NY-ESO-1–Reactive T-cell Receptor: Long-term Follow-up and Correlates with Response
Source: Oxford University Press journal article supplement (doi:10.1158/1078-0432.ccr-14-2708), 2014-12-24
Supplement: 10780432ccr142708-sup-139623_1_supp_2773261_ng4cjd.doc [file 10780432ccr142708-sup-139623_1_supp_2773261_ng4cjd.doc]

Supplementary Figure 1. Evaluation of persistence and function of TCR-transduced T cells following adoptive transfer in responding and non-responding patients. The persistence of NY-ESO-1 tetramer+ CD8+ (A) and CD4+ (B) T cells in PBMC obtained approximately one month following transfer is shown as the percentage of CD3**+** T cells. In addition, the IFN- ELISPOT responses of PBMC obtained at the same time to HLA-A*0201**+** target cells pulsed with the NY-ESO-1 peptide (C) or the HLA-A*0201**+** and NY-ESO-1**+** melanoma cell line 624 mel (D) is shown as the number of ELISPOTS per 105 PBMC. Median values are indicated by the horizontal bars.

Supplementary Figure 2. Evaluation of function of TCR-transduced T cells in vaccinated and unvaccinated patients. The persistence of CD8+ (A) or CD4+ (B) T cells reactive with the NY-ESO-1 tetramer in patient peripheral blood approximately one month following therapy, expressed as a percentage of CD3+ T cells, was evaluated in patients who either did or did not receive the recombinant NY-ESO-1 AVIPOX vaccine. In addition, the IFN- ELISPOT responses of PBMC obtained approximately one month following transfer to HLA-A*0201**+** target cells pulsed with the NY-ESO-1 peptide (C) or to the HLA-A*0201**+** and NY-ESO-1**+** melanoma cell line 624 mel (D) were evaluated in vaccinated and unvaccinated patients.
