# Supplementary figures and images for: A Pilot Trial Using Lymphocytes Genetically Engineered with an NY-ESO-1–Reactive T-cell Receptor: Long-term Follow-up and Correlates with Response
Source: Oxford University Press journal article supplement (doi:10.1158/1078-0432.ccr-14-2708), 2014-12-24

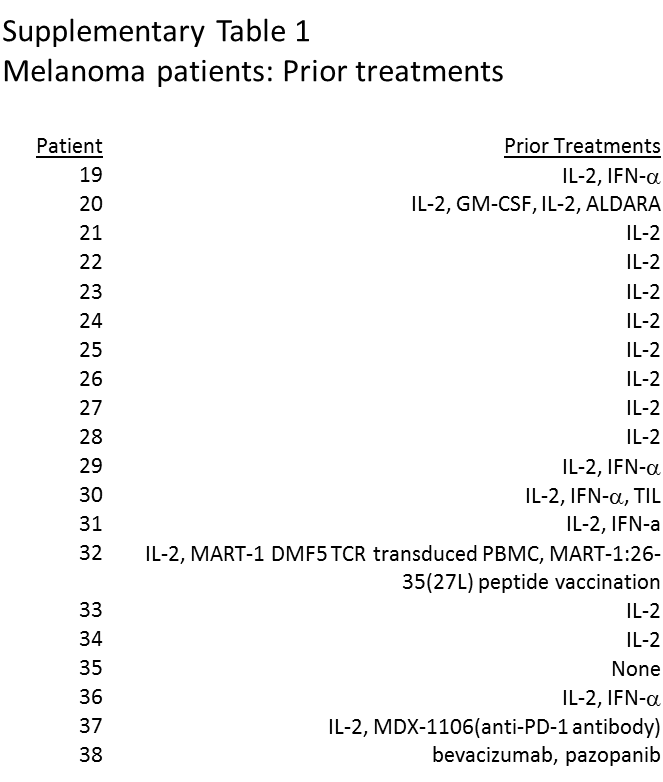

Supplement: 10780432ccr142708-sup-139623_1_supp_2773256_ng4bxn.doc [file 10780432ccr142708-sup-139623_1_supp_2773256_ng4bxn.doc]
